# Supplementary material
Source: publisher site journal article supplement (https://www.dovepress.com/article/322766)
Supplement: Supplementary file 1 [file get_supplementary_file.php]

**
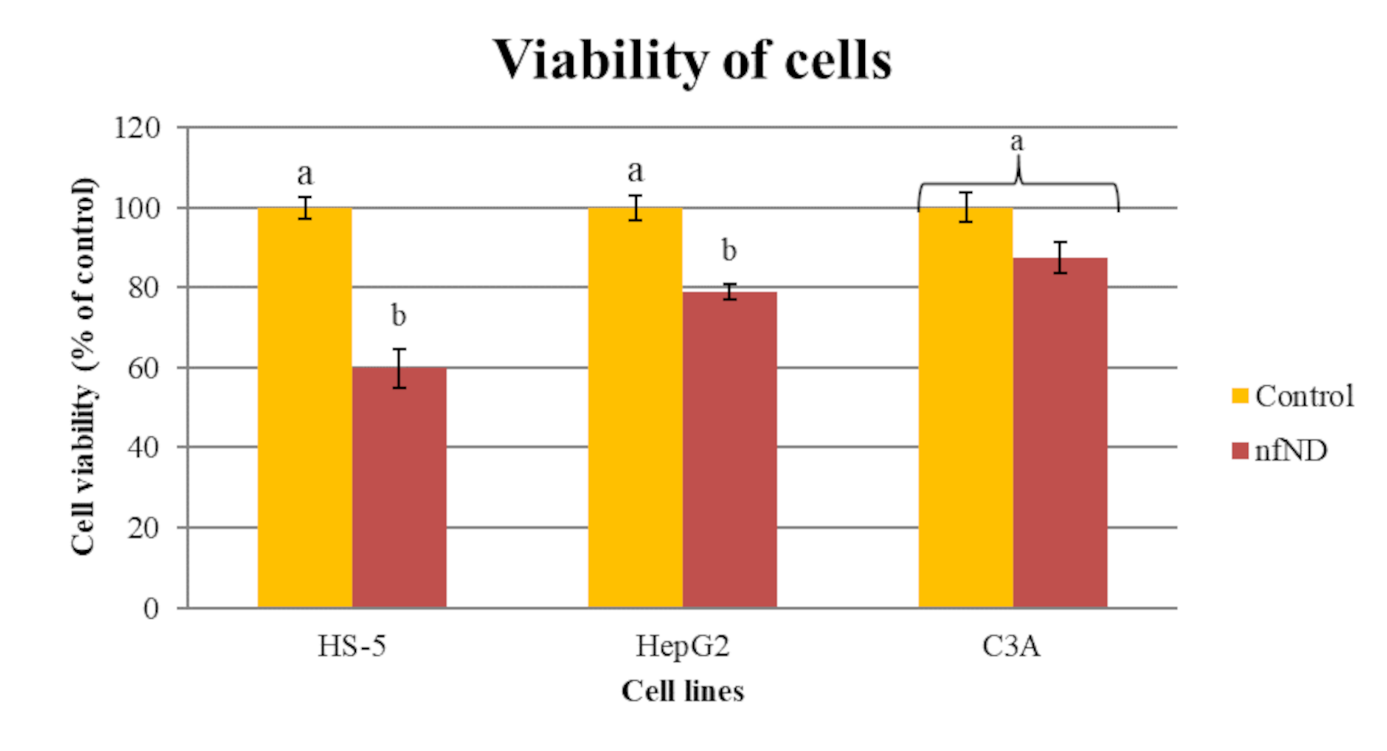
**

**Figure S1.** Analysis of HS-5, HepG2 and C3A cell viability after 48 h of cultivation on uncoated (control) and diamond-coated plates (nfND) using the XTT assay.

**Notes:** Different letters indicate significant differences control *vs* nfND (p ≤ 0.05, t-test).

**Table S1** The top 44 proteins from the HepG2 cells divided into functional activities according to UniProt database, including the name of the gene and the molecular mass of the protein (kDa). Fold changes (FC) in protein expression are shown. INF., infinity (t-test)

| No. | Gene name | Protein name | p-value | logFC  ND *v* C | Classification | Molecular mass [kDa] |
| --- | --- | --- | --- | --- | --- | --- |
| EXTRACELLULAR MATRIX | | | | | | |
| 1 | VTN | Vitronectin | < 0.00010 | INF | Upregulated | 54 |
| 2 | NID1 | Nidogen-1 | 0.00010 | 1.0413927 | 136 |
| 3 | SDC4 | Syndecan-4 | 0.00013 | INF | 22 |
| 4 | AFP | Alpha-fetoprotein | 0.00220 | 1.2304489 | 69 |
| ADHESION | | | | | | |
| 5 | TLN1 | Talin-1 | < 0.00010 | -0.6989700 | Downregulated | 270 |
| 6 | SPTAN1 | Spectrin alpha chain. non-erythrocytic 1 | < 0.00010 | -0.2218488 | 285 |
| 7 | MAP4 | Microtubule-associated protein | 0.00022 | -0.5228787 | 245 |
| 8 | ARHGDIA | Rho GDP-dissociation inhibitor 1 | 0.00046 | -1.3979400 | 23 |
| 9 | TPM3 | Tropomyosin alpha-3 chain | 0.00054 | -0.522879 | 26 |
| 10 | ITGα6 | Integrin alpha-6 | < 0.00010 | 8.0791813 | Upregulated | 127 |
| 11 | EPHA2 | Ephrin type-A receptor 2 | < 0.00010 | 7.8750613 | 108 |
| 12 | CADM1 | Cell adhesion molecule 1 (Fragment) | 0.00015 | INF | 46 |
| 13 | NECTIN2 | Nectin-2 | 0.00026 | 8.2552725 | 58 |
| 14 | EPCAM | Epithelial cell adhesion molecule | 0.00027 | INF | 38 |
| 15 | ITGα2 | Integrin alpha-2 | 0.00038 | 0.7323938 | 129 |
| 16 | ICAM1 | Intercellular adhesion molecule 1 | 0.00058 | 1.1461280 | 58 |
| 17 | FLOT2 | Flotillin-2 | 0.00059 | 1.5185139 | 47 |
| 18 | GJB1 | Gap junction beta-1 protein | 0.00080 | 8.4913617 | 32 |
| 19 | DPP4 | Dipeptidyl peptidase 4 | 0.00100 | INF | 88 |
| 20 | ITGβ1 | Integrin beta-1 | 0.00200 | 0.5314789 | 88 |
| MIGRATION | | | | | | |
| 21 | PLXNB2 | Plexin-B2 | < 0.00010 | INF | Upregulated | 205 |
| 22 | BST2 | Bone marrow stromal antigen 2 | 0.00023 | 0.7634280 | 20 |
| 23 | PLG | Plasminogen | 0.00068 | INF | 91 |
| 24 | FGFR4 | Fibroblast growth factor receptor 4 | 0.00160 | INF | 88 |
| OXIDATIVE PHOSPHORYLATION | | | | | | |
| 25 | NDUFS8 | NADH dehydrogenase [ubiquinone] iron-sulfur protein 8. mitochondrial | < 0.00010 | 1.0791813 | Upregulated | 24 |
| 26 | ETFDH | Electron transfer flavoprotein-ubiquinone oxidoreductase. mitochondrial | 0.00011 | INF | 68 |
| 27 | COQ9 | Ubiquinone biosynthesis protein COQ9. mitochondrial | 0.00011 | INF | 36 |
| 28 | NDUFB10 | NADH dehydrogenase [ubiquinone] 1 beta subcomplex subunit 10 | 0.00013 | 1.0000000 | 21 |
| 29 | ATP5PD | ATP synthase subunit d. mitochondrial | 0.00032 | 0.4771213 | 18 |
| 30 | COX6C | Cytochrome c oxidase subunit 6C | 0.00035 | 0.9912261 | 9 |
| 31 | NDUFB5 | Complex I-SGDH (Fragment) | 0.00040 | 1.4471580 | 24 |
| 32 | SDHB | Succinate dehydrogenase [ubiquinone] iron-sulfur subunit. Mitochondrial | 0.00043 | INF | 32 |
| 33 | ATP5F1B | ATP synthase subunit beta. mitochondrial | 0.00049 | 0.3617278 | 57 |
| 34 | UQCRB | Cytochrome b-c1 complex subunit 7 | 0.00092 | 1.0413927 | 14 |
| PROLIFERATION AND CELL CYCLE | | | | | | |
| 35 | TPR | Nucleoprotein TPR | < 0.00010 | -8.0000000 | Downregulated | 267 |
| 36 | SEPTIN9 | Septin-9 | 0.00014 | 0.0000000 | 65 |
| 37 | KIF5B | Kinesin-1 heavy chain | 0.00076 | 0.0000000 | 110 |
| 38 | DYNC1H1 | Cytoplasmic dynein 1 heavy chain 1 | 0.00095 | -0.3979400 | 532 |
| 39 | LMNA | Prelamin-A/C | 0.00200 | -1.1549020 | 81 |
| 40 | USP17L10 | Ubiquitin carboxyl-terminal hydrolase 17-like protein 10 | < 0.00010 | INF | Upregulated | 60 |
| 41 | PROM1 | Prominin-1 | 0.00047 | INF | 97 |
| 42 | NUP37 | Nucleoporin Nup37 | 0.00048 | INF | 37 |
| 43 | MACROH2A1 | Core histone macro-H2A1 | 0.00110 | 1.1760913 | 40 |
| 44 | LAMTOR1 | Ragulator complex protein LAMTOR1 | 0.00130 | 0.8450980 | 18 |

**Table S2** The top 44 proteins from the C3A cells divided into functional activities according to UniProt database, including the name of the gene and the molecular mass of the protein (kDa). Fold changes (FC) in protein expression are shown. INF., infinity (t-test)

| No. | Gene name | Protein name | p-value | logFC  ND *v* C | Classification | Molecular mass [kDa] |
| --- | --- | --- | --- | --- | --- | --- |
| EXTRACELLULAR MATRIX | | | | | | |
| 1 | LAD1 | Ladinin-1 | < 0.00010 | 0.0000000 | Downregulated | 57 |
| 2 | COL1A1 | Collagen alpha-1(I) chain | 0.00056 | INF | Upregulated | 139 |
| 3 | SERPINF2 | Alpha-2-antiplasmin | 0.00100 | INF | 55 |
| 4 | ITIH3 | Inter-alpha-trypsin inhibitor heavy chain H3 | 0.00150 | INF | 100 |
| 5 | AFP | Alpha-fetoprotein | 0.00085 | 1,14612804 | 69 |
| ADHESION | | | | | | |
| 6 | MYH9 | Myosin-9 | < 0.00010 | -8,3979400 | Downregulated | 227 |
| 7 | MYH10 | Myosin-10 | < 0.00010 | 0.0000000 | 229 |
| 8 | SPTBN1 | Spectrin beta chain. non-erythrocytic 1 | < 0.00010 | -7,6989700 | 275 |
| 9 | TWF1 | Twinfilin-1 | < 0.00010 | 0.0000000 | 40 |
| 10 | KRT23 | Keratin. type I cytoskeletal 23 | 0.00019 | 0.0000000 | 48 |
| 11 | CTNNA1 | Catenin alpha-1 | 0.00024 | 0.0000000 | 100 |
| 12 | EZR | Ezrin | 0.00030 | 0.0000000 | 69 |
| 13 | LMO7 | LIM domain only protein 7 | 0.00039 | 0.0000000 | 145 |
| 14 | SEPTIN2 | Septin-2 | 0.00051 | 0.0000000 | 41 |
| 15 | LASP1 | LIM and SH3 domain protein 1 | 0.00060 | 0.0000000 | 30 |
| 16 | DSP | Desmoplakin | 0.00071 | -8,3010300 | 332 |
| 17 | PLEC | Plectin | 0.00099 | -0,3979400 | 532 |
| 18 | ADD1 | Alpha-adducin | 0.00200 | 0.0000000 | 81 |
| 19 | TPM3 | Tropomyosin alpha-3 chain | 0.00032 | 0,34242268 | Upregulated | 26 |
| 20 | GSN | Actin-depolymerizing factor | 0.00033 | 7,79934055 | 83 |
| 21 | ITGβ1 | Integrin beta-1 | 0.00226 | 0.44715803 | 88 |
| MIGRATION | | | | | | |
| 22 | DPYSL2 | Dihydropyrimidinase-related protein 2 | < 0.00010 | 0.0000000 | Downregulated | 62 |
| 23 | FLNA | Filamin-A | < 0.00010 | -2,1549020 | 281 |
| 24 | PDLIM1 | PDZ and LIM domain protein 1 | < 0.00010 | -8,5228788 | 36 |
| 25 | AIMP1 | Aminoacyl tRNA synthase complex-interacting multifunctional protein 1 | 0.00058 | 0.0000000 | 34 |
| OXIDATIVE PHOSPHORYLATION | | | | | | |
| 26 | ALDH4A1 | Delta-1-pyrroline-5-carboxylate dehydrogenase. mitochondrial | < 0.00010 | -0.5228788 | Downregulated | 62 |
| 27 | COQ9 | Ubiquinone biosynthesis protein COQ9. mitochondrial | < 0.00010 | 8.04139269 | Upregulated | 36 |
| 28 | ATP5ME | ATP synthase subunit e. mitochondrial | 0.00100 | 1.04139269 | 8 |
| PROLIFERATION AND CELL CYCLE | | | | | | |
| 29 | DYNC1H1 | Cytoplasmic dynein 1 heavy chain 1 | < 0.00010 | -1.1549020 | Downregulated | 532 |
| 30 | LMNB1 | Lamin-B1 | < 0.00010 | 0.0000000 | 66 |
| 31 | LMNB2 | Lamin-B2 | < 0.00010 | 0.0000000 | 70 |
| 32 | TPR | Nucleoprotein TPR | < 0.00010 | -1.3010300 | 267 |
| 33 | LMNA | Prelamin-A/C | < 0.00010 | 0.0000000 | 81 |
| 34 | NOP2 | Probable 28S rRNA (cytosine(4447)-C(5))-methyltransferase | < 0.00010 | -8.0457575 | 89 |
| 35 | RPRD1B | Regulation of nuclear pre-mRNA domain-containing protein 1B | < 0.00010 | 0.0000000 | 37 |
| 36 | DHX9 | ATP-dependent RNA helicase A | < 0.00010 | -8.3010300 | 141 |
| 37 | EIF3I | Eukaryotic translation initiation factor 3 subunit I | 0.00014 | 0.0000000 | 37 |
| 38 | PDIA3 | Protein disulfide-isomerase A3 (Fragment) | 0.00023 | -1,2218488 | 14 |
| 39 | MCM2 | DNA replication licensing factor MCM2 | 0.00070 | 0.0000000 | 102 |
| 40 | MACROH2A1 | Core histone macro-H2A1 | 0.00079 | -7.6989700 | 40 |
| 41 | EML4 | Echinoderm microtubule-associated protein-like 4 | 0.00100 | 0.0000000 | 109 |
| 42 | CKAP4 | Cytoskeleton-associated protein 4 | 0.00110 | -0,6989700 | 66 |
| 43 | EIF3A | Eukaryotic translation initiation factor 3 subunit A | 0.00110 | 0.0000000 | 167 |
| 44 | DCTN2 | Dynactin subunit 2 | 0.00190 | 0.0000000 | 44 |
